# Supplementary material for: Facile strategy of NCA cation mixing regulation and its effect on electrochemical performance
Source: Royal Society of Chemistry journal article supplement (doi:10.1039/c6ra20146f), 2016-01-01

## Supporting information

### Facile strategy of NCA cation mixing regulation and its effect on electrochemical performance

*Bao-sheng Liu<sup>1</sup>, Zhen-Bo Wang<sup>1,\*</sup>, Fu-Da Yu<sup>1</sup>, Yuan Xue<sup>1</sup>, Guang-jin Wang<sup>2</sup> Yin  
Zhang<sup>1</sup>, Yu-Xiang Zhou<sup>1</sup>,*

<sup>1</sup> MIIT Key Laboratory of Critical Materials Technology for New Energy Conversion  
and Storage, School of Chemistry and Chemical Engineering, Harbin Institute of  
Technology, No.92 West-Da Zhi Street, Harbin, 150001 China.

<sup>2</sup> Shaanxi Institute of Applied Physical Chemistry

No.213 Zhuque Street, Xi'an, Shaanxi

\* *Corresponding author. Tel.: +86-451-86417853; Fax: +86-451-86418616*

*E-mail address: [wangzjb@hit.edu.cn](mailto:wangzjb@hit.edu.cn) (Z.B. Wang)*

XPS spectra of the Ni 2p for NCA powders has been carried out to determine the oxidation states of Ni in these materials. The peak fitting procedure reveals two binding energies for Ni (2p<sub>3/2</sub>): 854.6 and 855.4 eV [7]. The lower BE confirm the presence of Ni<sup>2+</sup> in the compound, and the higher BE coincides with that of Ni<sup>2+</sup>. There is a small amount of Ni<sup>2+</sup> on the surface of the materials which could be concluded by the peak area. Obviously, most of the nickel ions are trivalence.

[7] J.K. Ngala, N.A. Chernova, M. Ma, et, al., J. Mater. Chem., 14 (2004), 214–220.

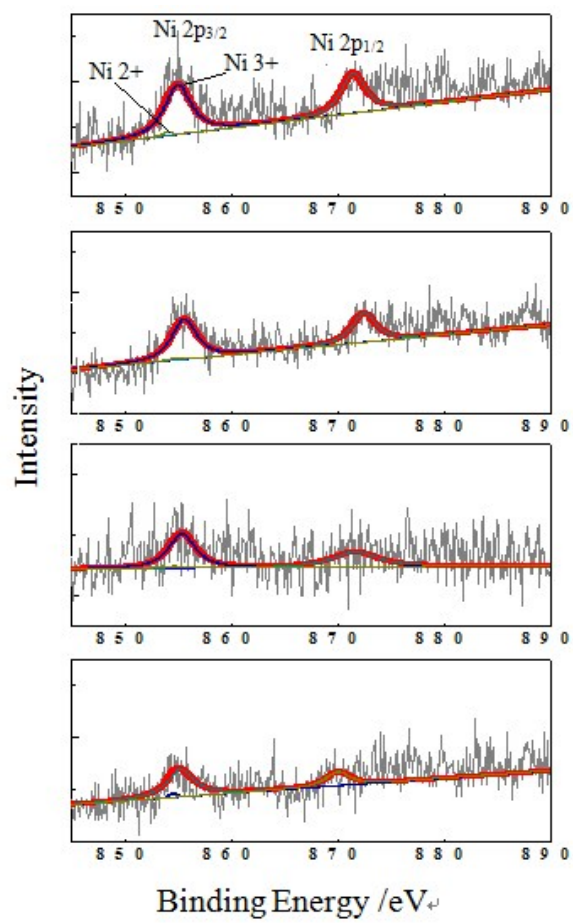

Supplement: c6ra20146f1.pdf [file c6ra20146f1.pdf]
